# Supplementary material for: Cinnamon Oil-Loaded Nanoliposomes with Potent Antibacterial and Antibiofilm Activities
Source: MDPI journal article supplement (doi:10.3390/molecules28114492), 2023-06-01
Supplement: s1 [file s1]

# Cinnamon-oil-loaded nanoliposomes with potent antibacterial and antibiofilm activities

Neveen M. Ellboudy<sup>1</sup>, Bassma H Elwakil<sup>2\*</sup>, Marwa M. Shaaban<sup>3</sup>, Zakia A Olama<sup>1</sup>

<sup>1</sup> Department of Botany & Microbiology, Faculty of Science,  
Alexandria University, Alexandria 21568, Egypt

<sup>2</sup> Department of Medical Laboratory Technology, Faculty of Applied Health  
Sciences Technology, Pharos University in Alexandria, Alexandria 21500, Egypt

<sup>3</sup> Department of Pharmaceutical Chemistry, Faculty of Pharmacy,  
Alexandria University, Alexandria 21568, Egypt

\* Correspondence: bassma.hassan@pua.edu.eg

## Supplementary data

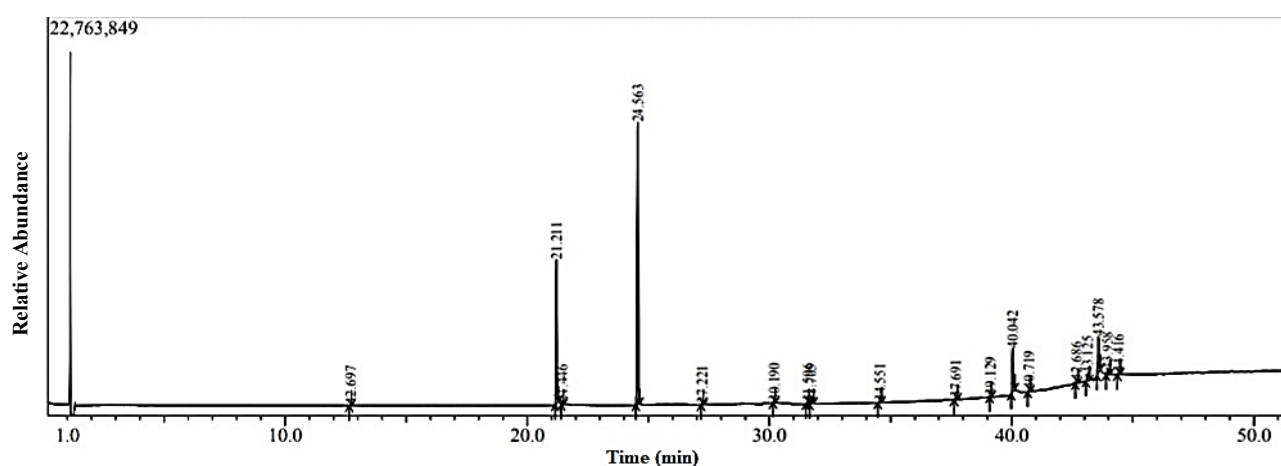

Figure S1. GC-MS chromatogram of cinnamon oil.

Table S1. The main predicted compounds of cinnamon oil extract structures.

| Peak | Retention time | Area (%) | Name                                        |
|------|----------------|----------|---------------------------------------------|
| 1    | 12.6           | 0.3      | Benzaldehyde                                |
| 2    | 21.2           | 23.5     | Benzyl alcohol                              |
| 3    | 21.4           | 0.3      | 2-propenal, 3-phenyl                        |
| 4    | 24.5           | 52.1     | 2-propenal, 3-phenyl                        |
| 5    | 27.2           | 0.3      | 3-allyl-6-methoxyphenol                     |
| 6    | 30.1           | 0.2      | Diethyl phthalate                           |
| 7    | 31.5           | 0.7      | 1,7-di(3-ethylphenyl)                       |
| 8    | 31.7           | 0.5      | 1,7-di(3-ethylphenyl)                       |
| 9    | 34.5           | 0.4      | 1,2-diphenyltetramethyldisilane             |
| 10   | 37.6           | 0.4      | Bis-di(trimethylsiloxy)phenylsiloxy propane |
| 11   | 39.1           | 0.4      | Hexadecenoic acid, 1 hydroxymethane         |
| 12   | 40.0           | 8.1      | n-Hexadecenoic acid                         |
| 13   | 40.7           | 0.5      | Bis-di(trimethylsiloxy)phenylsiloxy propane |
| 14   | 42.6           | 0.7      | 9-Octadecanoic acid,1,2,3-propane           |
| 15   | 43.1           | 2.1      | Octadecanoic acid                           |
| 16   | 43.5           | 7.7      | Oleic acid                                  |
| 17   | 43.9           | 1.2      | Triphenylphosphine oxide                    |
| 18   | 44.4           | 0.6      | 9,12-octadecadienoic acid (Z,Z)             |

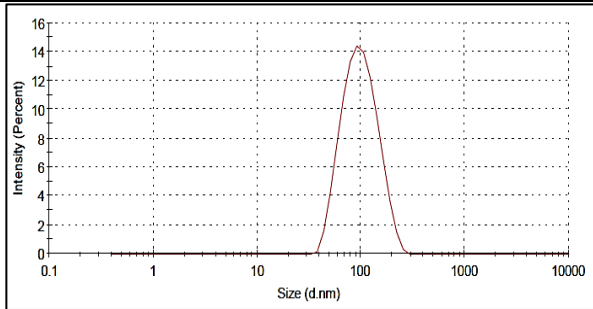

(a)

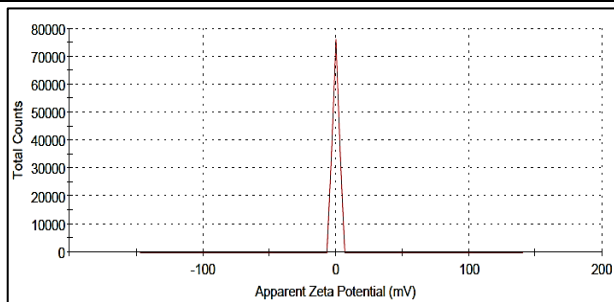

(b)

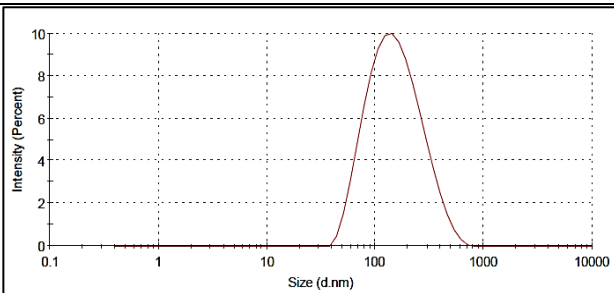

(c)

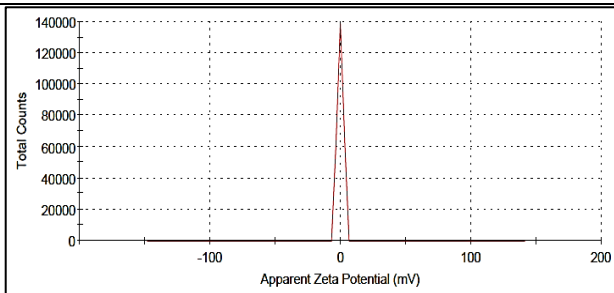

(d)

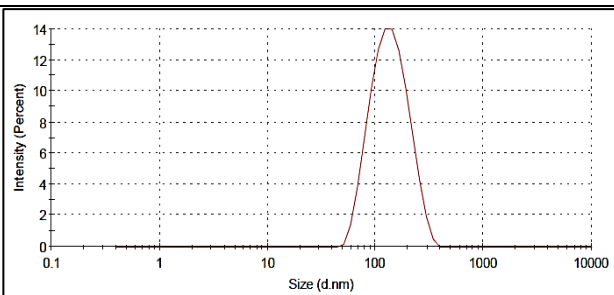

(e)

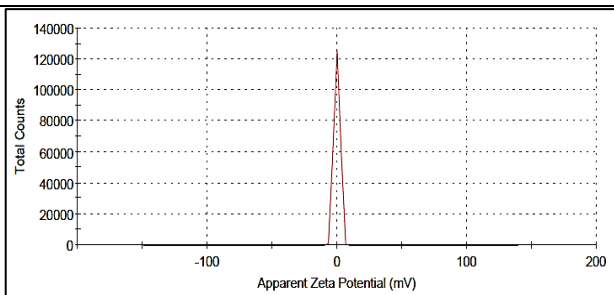

(f)

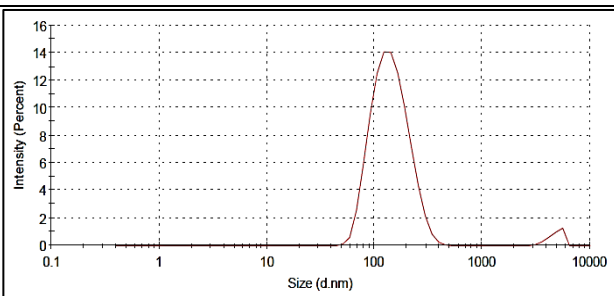

(g)

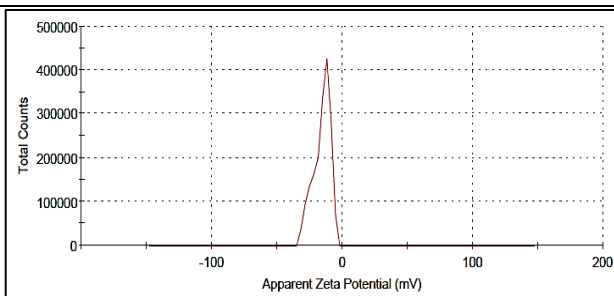

(h)

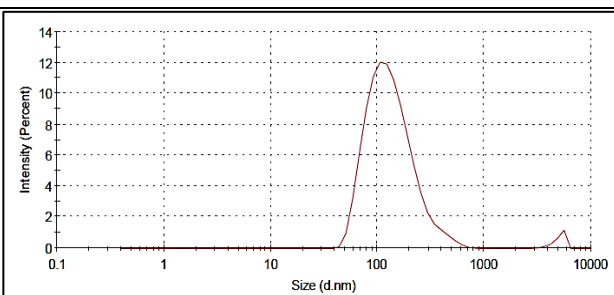

(i)

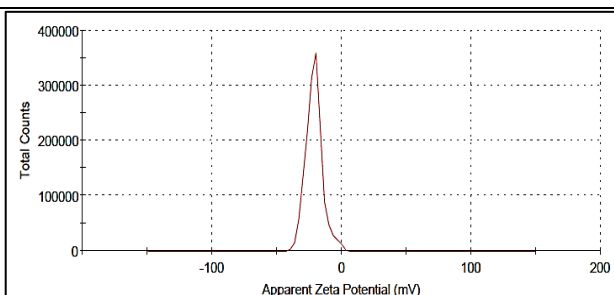

(j)

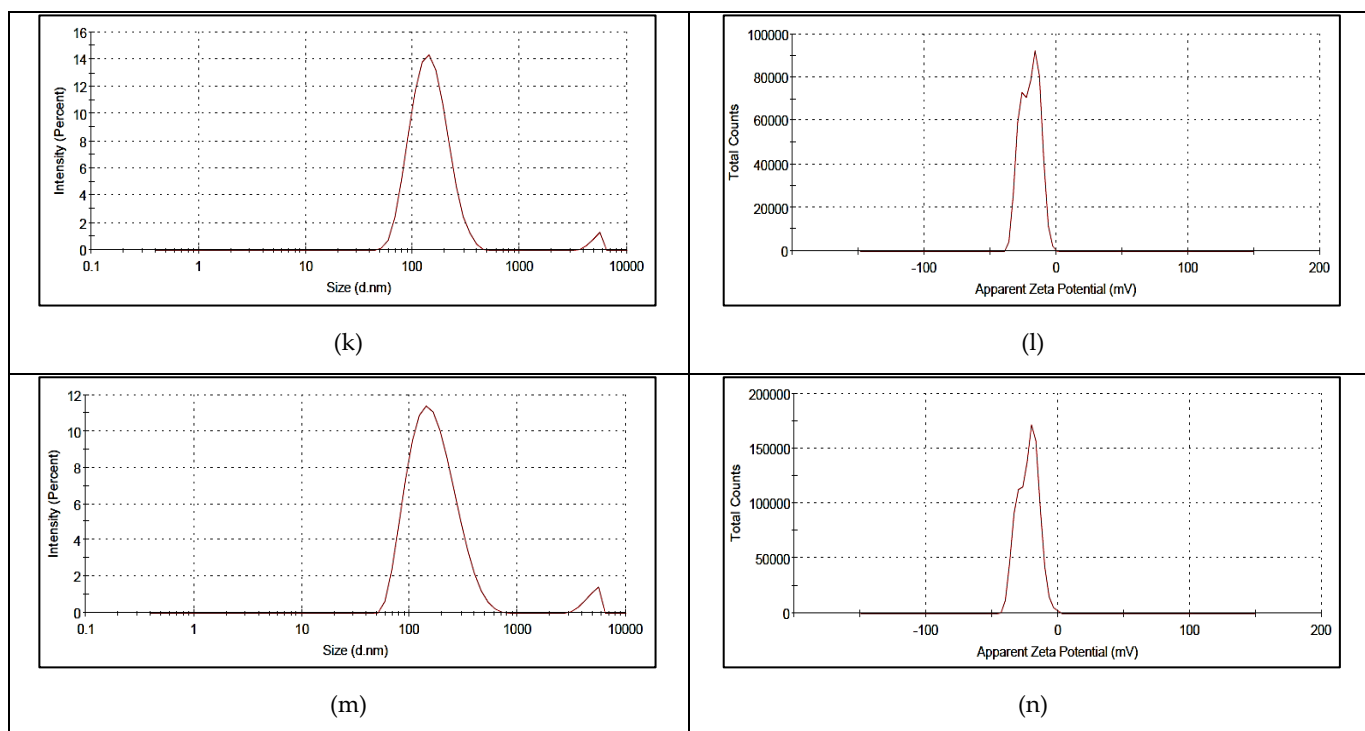

**Figure S2.** Zeta size and potential of the synthesized nanoliposomes: COE 2 (2  $\mu\text{g/mL}$ ; a, b), COE 5 (5  $\mu\text{g/mL}$ ; c, d), COE 10 (10  $\mu\text{g/mL}$ ; e, f), Colistin 2 (2  $\mu\text{g/mL}$ ; g, h), Colistin 5 (5  $\mu\text{g/mL}$ ; i, j), COE/Colistin 2 (2  $\mu\text{g/mL}$  each; k, l) and COE/Colistin 5 (5  $\mu\text{g/mL}$  each; m, n).
